# Supplementary material
Source: PubMed Central journal article supplement (PMC4782775)
Supplement: NIHMS762556-supplement-Supplementary_Data.pdf [file NIHMS762556-supplement-Supplementary_Data.pdf]

This study was funded by the UAB College of Arts and Sciences Interdisciplinary Innovation Award to RK. The authors would also like to thank Dr. Meredith Reid and David White for their assistance with the 1H-MRS aspect of this project. The authors would also like to thank Dr. Jason Yeatman, Dr. Franco Pestilli, Dr. Brian Wandell, and the Stanford Vision and Imaging Science and Technology Laboratory for providing access to the *mrDiffusion* and *AFQ* software, and their assistance with these resources.

Appendix A. Supplementary data

The following are the supplementary data related to this article:

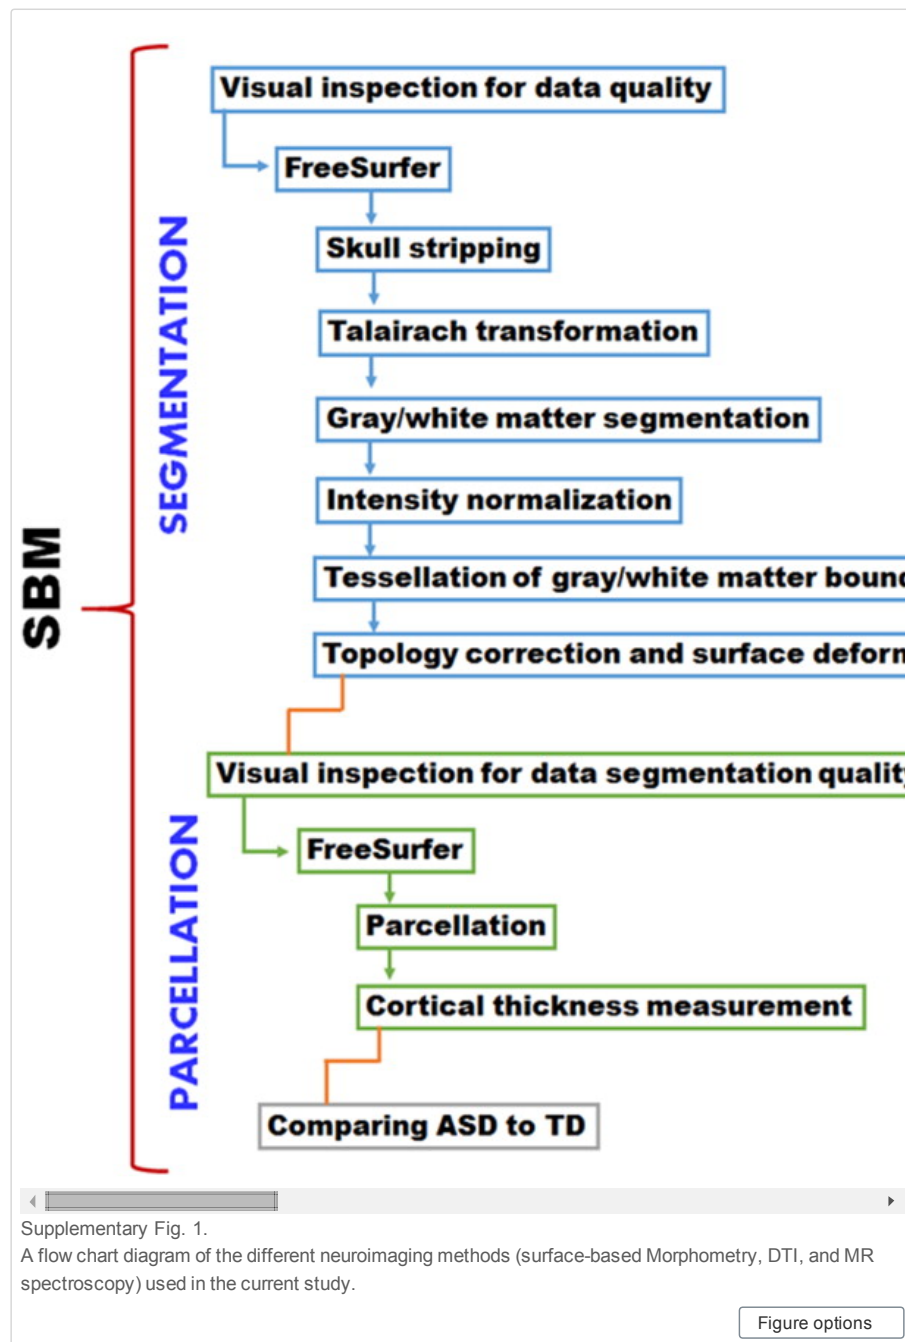

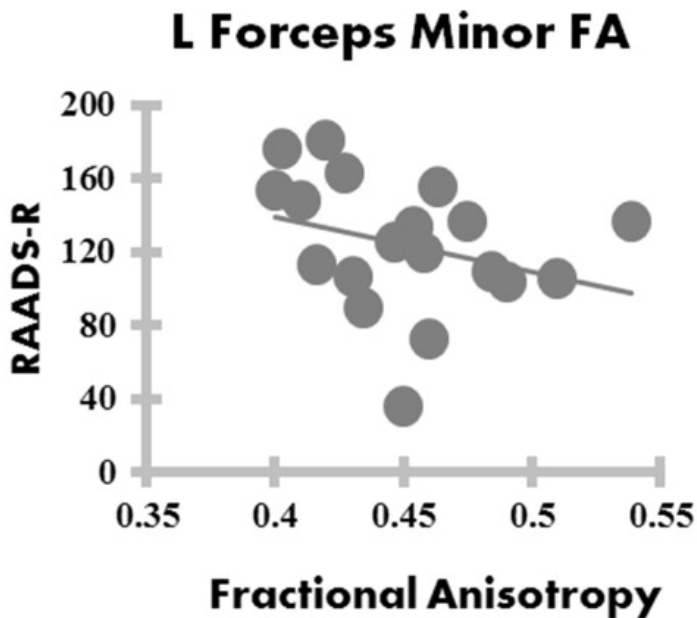

A)

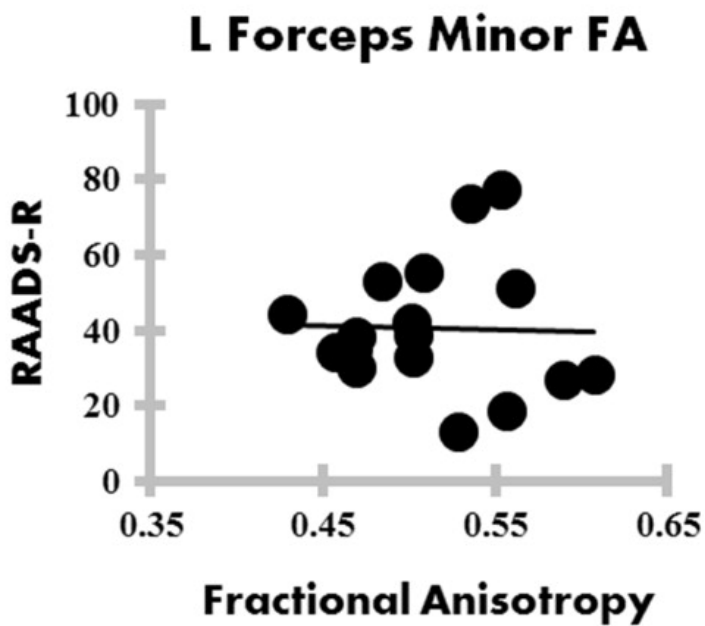

● ASD

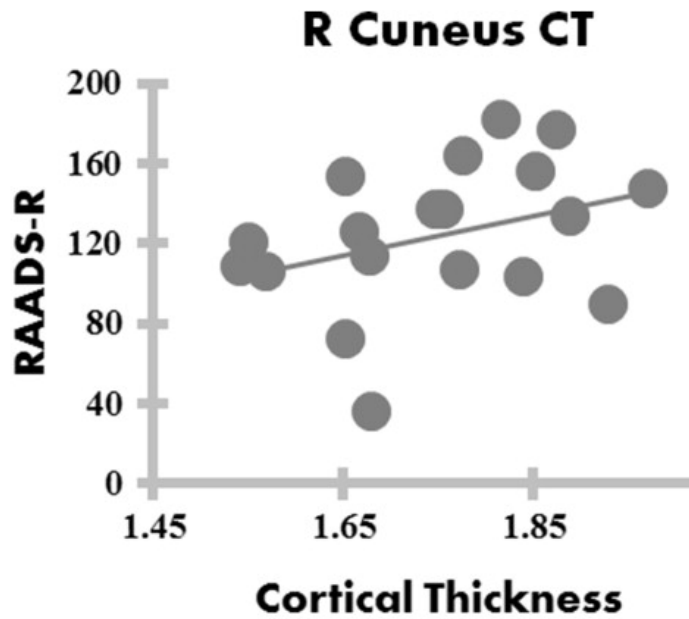

**B)**

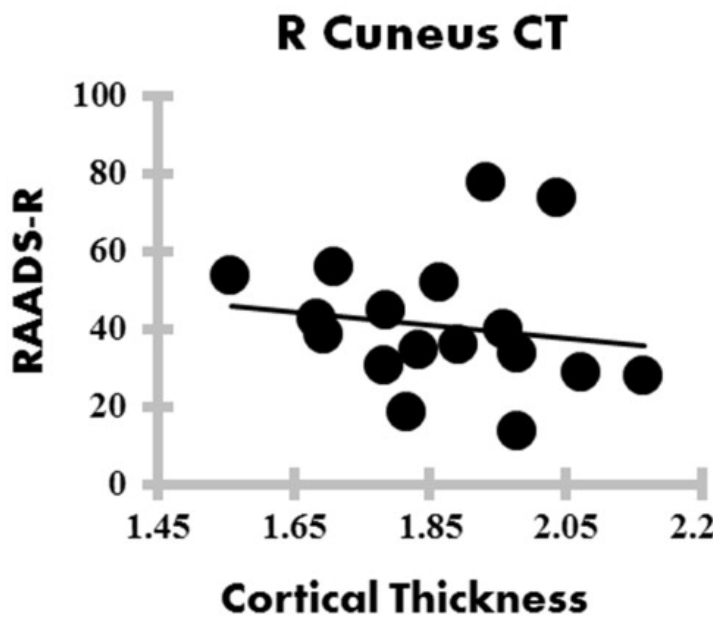

Supplementary Fig. 2.

Simple correlations between each of the brain measure predictors (A: diffusion measures and its relationship with autism symptoms measured by RAADS; B: cortical thickness measures and its relationship with autism symptoms measured by RAADS) included in the decision tree classification models and ASD symptom severity (measured by the RAADS-R) for each group.

Figure options

References

Adolphs, 2001 R. Adolphs  
The neurobiology of social cognition
